# Supplementary material
Source: PubMed Central journal article supplement (PMC4074212)
Supplement: np500198g_si_001.pdf [file np500198g_si_001.pdf]

# Supporting information

**Tetra- and pentacyclic triterpene acids from the ancient anti-inflammatory remedy frankincense as inhibitors of microsomal prostaglandin E2 synthase-1**

*Moritz Verhoff, Stefanie Seitz, Michael Paul, Stefan M. Noha, Johann Jauch, Daniela Schuster, Oliver Werz*

**Content:**

**Isolation and structure elucidation of the triterpene acids**

## 1. Preparation of boswellic acids

Boswellic acids (**1** – **4**) were synthesized according to J. Jauch and J. Bergmann, *Eur. J. Org. Chem.* **2003**, 4752-4756.

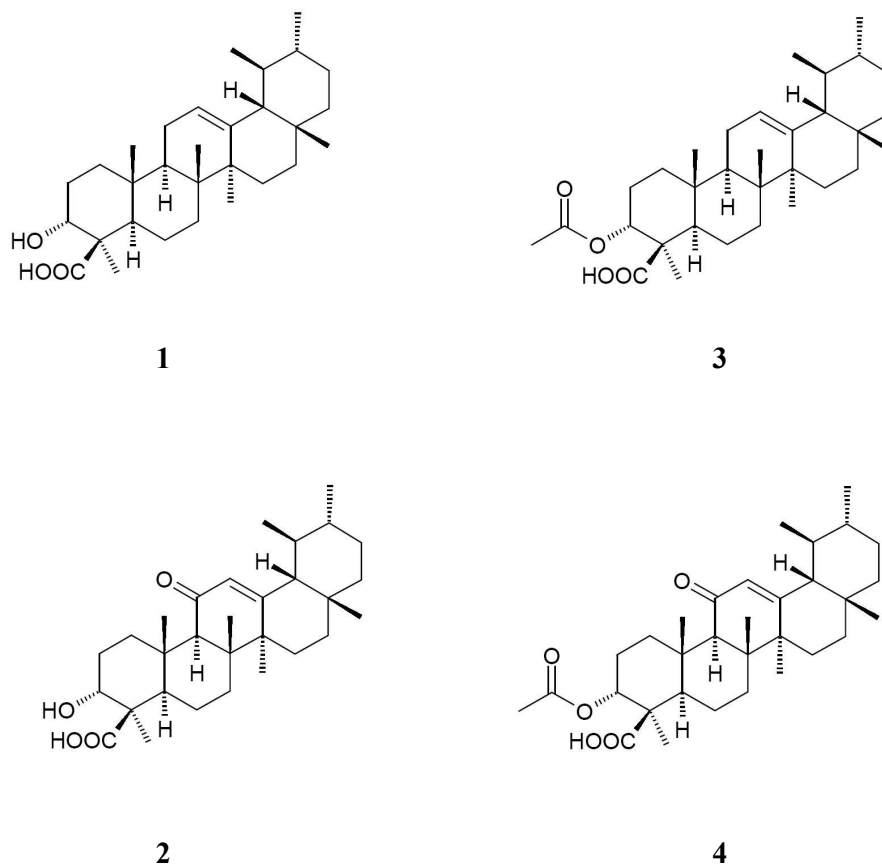

**Fig. S1.** Structures of boswellic acids **1-4**.  $\beta$ -Boswellic acid (**1**), 11-keto- $\beta$ -boswellic acid (**2**), 3-O-acetyl- $\beta$ -boswellic acid (**3**), and 3-O-acetyl-11-keto- $\beta$ -boswellic acid (**4**).

## 2. Extraction and isolation of the compounds 5 – 11 from *Boswellia papyrifera*.

The compounds described below were isolated according to the general procedures (see main manuscript) and according to Fig. S2.

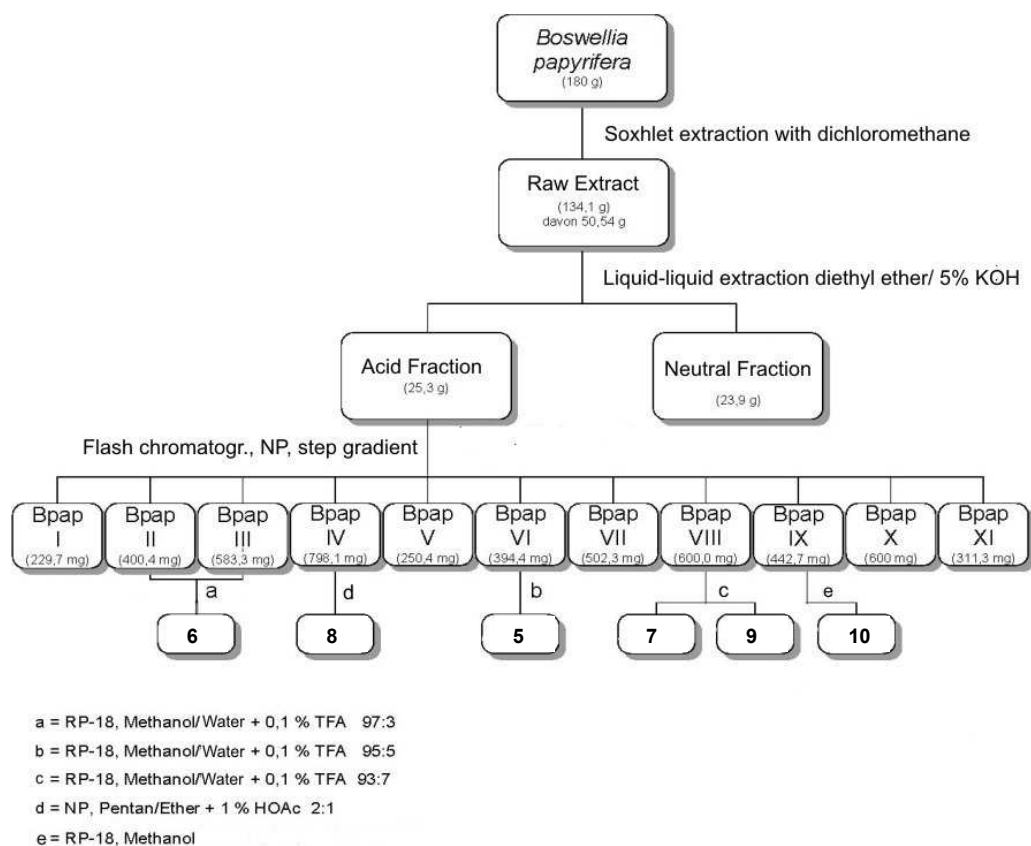

**Fig. S2.** Isolation of compounds 5 to 10.

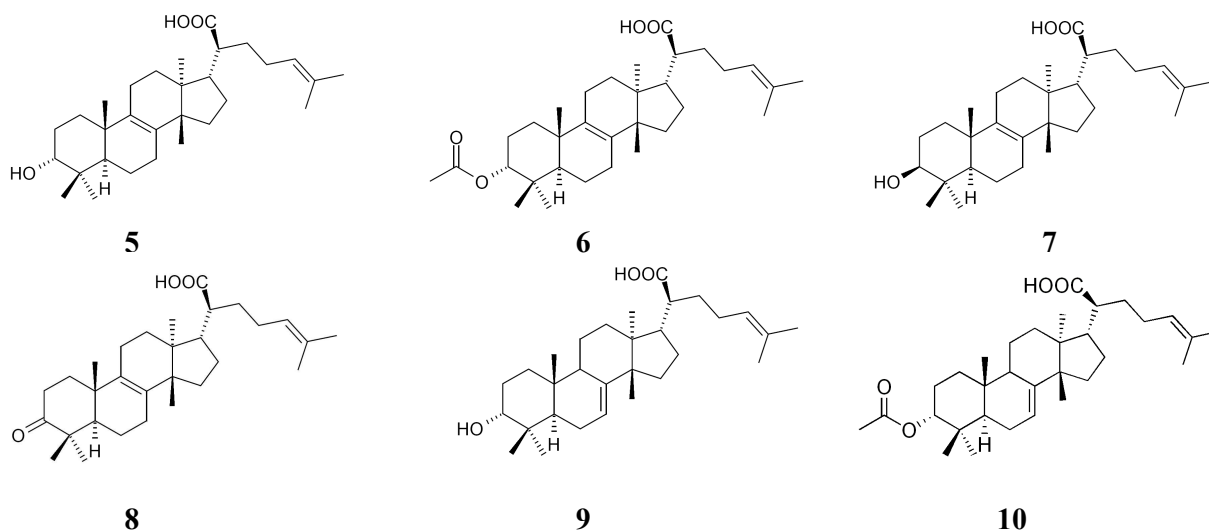

**Fig. S3.** Structures of the isolated compounds 5 to 10. 3- $\alpha$ -hydroxy-8,24-diene-tirucallic acid (5), 3- $\alpha$ -acetoxy-8,24-diene-tirucallic acid (6), 3- $\beta$ -hydroxy-8,24-diene-tirucallic acid (7), 3-oxo-8,24-diene-tirucallic acid (8), 3- $\alpha$ -hydroxy-7,24-diene-tirucallic acid (9), and 3- $\alpha$ -acetoxy-7,24-diene-tirucallic acid (10).

Data for **5**:

**<sup>1</sup>H-NMR** ((CD<sub>3</sub>)<sub>2</sub>CO, 500.13 MHz): δ [ppm] = 5.12 (t, *J* = 7.2 Hz, 1H, H-24), 3.36 (t, *J* = 2.7 Hz, 1H, H-3), 2.26 (dt, *J* = 4.8 Hz, 10.4 Hz, 1H, H-20), 2.14-2.07 (m, 3H, H-7 $\alpha$ , H-17, H-11 $\alpha$ ), 2.03–1.88 (m, 6H, H-2 $\beta$ , H-7 $\beta$ , H-11 $\beta$ , H-16 $\beta$ , H-22 $\beta$ , H-23 $\beta$ ), 1.73-1.70 (m, 1H, H-5), 1.65 (s, 3H, H-26), 1.65-1.59 (m, 5H, H-1 $\beta$ , H-2 $\alpha$ , H-6 $\alpha$ , H-12 $\beta$ , H-15 $\alpha$ ), 1.58 (s, 3H, H-27), 1.56-1.40 (m, 5H, H-1 $\alpha$ , H-6 $\beta$ , H-12 $\alpha$ , H-16 $\alpha$ , H-22 $\alpha$ ), 1.29-1.20 (m, 1H, H-15 $\beta$ ), 1.06-1.02 (m, 1H, H-23 $\alpha$ ), 0.97 (s, 3H, H-18), 0.95 (s, 3H, H-29), 0.90 (s, 3H, H-30), 0.87 (s, 3H, H-19), 0.84 (s, 3H, H-28)

**<sup>13</sup>C-NMR** ((CD<sub>3</sub>)<sub>2</sub>CO, 125.76 MHz): δ [ppm] = 178.5 (C-21, COOH), 136.6 (C-9, >C=C<), 134.7 (C-8, >C=C<), 133.2 (C-25, H>C=C<), 125.8 (C-24, H>C=C<), 76.4 (C-3, HO>CH-), 49.4 (C-20, HOOC>CH-), 48.6 (C-17, >CH-), 46.4 (C-5, >CH-), 45.7 (C-13, >C<), 39.3 (C-4, >C<), 38.9 (C-10, >C<), 34.4 (C-22, -CH<sub>2</sub>-), 31.5 (C-1, -CH<sub>2</sub>-), 29.8 (C-29, -CH<sub>3</sub>), 29.1 (C-7, -CH<sub>2</sub>-), 28.5 (C-16, -CH<sub>2</sub>-), 27.9 (C-2, -CH<sub>2</sub>-), 27.7 (C-23, -CH<sub>2</sub>-), 26.8 (C-26, -CH<sub>3</sub>), 25.7 (C-30, -CH<sub>3</sub>), 23.7 (C-28, -CH<sub>3</sub>), 23.0 (C-11, -CH<sub>2</sub>-), 21.4 (C-18, -CH<sub>3</sub>), 20.5 (C-6, -CH<sub>2</sub>-), 18.7 (C-27, -CH<sub>3</sub>), 17.1 (C-19, -CH<sub>3</sub>)

**MS** (CI, 150 eV): *m/z* (%) = 456 (40) [M]<sup>+</sup>, 423 (100), 281 (8), 187 (8)

**HRMS** (CI, 150 eV): calculated for C<sub>30</sub>H<sub>48</sub>O<sub>3</sub> 456.3603; found:456.3599

Data for **6**:

**<sup>1</sup>H-NMR** ((CD<sub>3</sub>)<sub>2</sub>CO, 500.13 MHz): δ [ppm] = 5.31 (t, *J* = 7.2 Hz, 1H, H-24), 4.61 (t, *J* = 2.7 Hz, 1H, H-3), 2.27 (dt, *J* = 4.4 Hz, 10.6 Hz, 1H, H-20), 2.17-2.09 (m, 2H, H-7 $\alpha$ , H-17), 2.00 (s, 3H, H-32), 1.98–1.89 (m, 5H, H-2 $\beta$ , H-7 $\beta$ , H-11 $\beta$ , H-16 $\beta$ , H-23 $\alpha$ ), 1.66 (s, 3H, H-26), 1.65-1.59 (m, 5H, H-2 $\alpha$ , H-5, H-6 $\alpha$ , H-12 $\alpha$ , H-15 $\alpha$ ), 1.58 (s, 3H, H-27), 1.56-1.37 (m, 5H, H-1 $\alpha$ , H-1 $\beta$ , H-6 $\beta$ , H-12 $\beta$ , H-16 $\alpha$ , H-22 $\alpha$ ), 1.29-1.27 (m, 1H, H-15 $\beta$ ), 1.01 (s, 3H, H-18), 0.93 (s, 3H, H-29) 0.91 (s, 3H, H-30), 0.88 (s, 3H, H-19), 0.87 (s, 3H, H-28).

**<sup>13</sup>C-NMR** ((CD<sub>3</sub>)<sub>2</sub>CO, 125.76 MHz): δ [ppm] = 178,3 (C-21, COOH), 171,5 (C-31, >C=O), 136.3 (C-9, >C=C<), 134.9 (C-8, >C=C<), 133.2 (C-25, H>C=C<), 125.8 (C-24, H>C=C<), 79.1 (C-3, HO>CH-), 51.4 (C-14, >C<), 49.4 (C-20, HOOC>CH-), 48.6 (C-17, >CH-), 47.8 (C-5, >CH-), 45.7 (C-13, >C<), 38.9 (C-10, >C<), 38.5 (C-4, >C<), 34.4 (C-22, -CH<sub>2</sub>-), 32.2 (C-1, -CH<sub>2</sub>-), 29.1 (C-28, -CH<sub>3</sub>), 28.8 (C-7, -CH<sub>2</sub>-), 28.5 (C-16, -CH<sub>2</sub>-), 27.7 (C-23, -CH<sub>2</sub>-), 26.8 (C-26, -CH<sub>3</sub>), 25.8 (C-30, -CH<sub>3</sub>), 25.0 (C-2, -CH<sub>2</sub>-), 23.2 (C-29, -CH<sub>3</sub>), 23.0 (C-11, -CH<sub>2</sub>-), 22.1 (C-32, -CH<sub>3</sub>), 21.3 (C-18, -CH<sub>3</sub>), 20.3 (C-6, -CH<sub>2</sub>-), 18.7 (C-27, -CH<sub>3</sub>), 17.2 (C-19, -CH<sub>3</sub>).

**MS** (CI, 150 eV):  $m/z$  (%) = 498 (70) [M]<sup>+</sup>, 483 (12), 439 (84), 423 (100), 343 (24), 281 (20), 189 (16), 95 (12).

**HRMS** (CI, 150 eV): calculated for C<sub>32</sub>H<sub>50</sub>O<sub>4</sub>: 498.3709; found: 498.3702

Data for **7**:

**<sup>1</sup>H-NMR** ((CD<sub>3</sub>)<sub>2</sub>SO, 500.13 MHz):  $\delta$  [ppm] = 5.07 (t,  $J$  = 6.5 Hz, 1H, H-24), 3.0 (dd,  $J$  = 5.2 Hz, 10.8 Hz, 1H, H-3), 2.15-2.04 (m, 2H, H-7 $\alpha$ , H-20), 1.92-1.81 (m, 6H, H-7 $\beta$ , H-11 $\alpha$ , H-11 $\beta$ , H-17, H-22 $\alpha$ , H-23 $\alpha$ ), 1.67-1.63 (m, 2H, H-1 $\beta$ , H-6 $\beta$ ), 1.63 (s, 3H, H-26), 1.53 (s, 3H, H-27), 1.51-1.01 (m, 13H, H-1 $\alpha$ , H-2 $\alpha$ , H-2 $\beta$ , H-5, H-12 $\alpha$ , H-12 $\beta$ , H-15 $\alpha$ , H-15 $\beta$ , H-16 $\alpha$ , H-22 $\beta$ ), 0.90 (s, 3H, H-29), 0.89 (s, 3H, H-18), 0.82 (s, 3H, H-30), 0.74 (s, 3H, H-19), 0.69 (s, 3H, H-28)

**<sup>13</sup>C-NMR** ((CD<sub>3</sub>)<sub>2</sub>SO, 125.76 MHz):  $\delta$  [ppm] = 176.8 (C-21, COOH), 133.8 (C-9, >C=C<), 132.4 (C-8, >C=C<), 131.0 (C-25, H>C=C<), 123.7 (C-24, H>C=C<), 76.6 (C-3, HO>CH-), 50.5 (C-5, >CH-), 48.9 (C-14, >C<), 47.2 (C-20, HOOC>CH-), 46.2 (C-17, >CH-), 43.3 (C-13, >C<), 38.5 (C-4, >C<), 36.7 (C-10, >C<), 34.7 (C-1, -CH<sub>2</sub>-), 32.1 (C-16, -CH<sub>2</sub>-), 28.8 (C-15, -CH<sub>2</sub>-), 28.2 (C-12, -CH<sub>2</sub>-), 28.1 (C-29, -CH<sub>3</sub>), 27.5 (C-2, -CH<sub>2</sub>-), 27.1 (C-7, -CH<sub>2</sub>-), 26.2 (C-22, -CH<sub>2</sub>-), 25.4 (C-23, -CH<sub>3</sub>), 25.4 (C-26, -CH<sub>3</sub>), 24.1 (C-30, -CH<sub>3</sub>), 20.7 (C-11, -CH<sub>2</sub>-), 19.9 (C-18, -CH<sub>3</sub>), 18.4 (C-6, -CH<sub>2</sub>-), 17.4 (C-27, -CH<sub>3</sub>), 15.9 (C-28, -CH<sub>3</sub>), 15.4 (C-19, -CH<sub>3</sub>).

Data for **8**:

**<sup>1</sup>H-NMR** ((CD<sub>3</sub>)<sub>2</sub>CO, 500.13 MHz):  $\delta$  [ppm] = 5.13 (t,  $J$  = 7.2 Hz, 1H, H-24), 2.56-2.40 (m, 2H, H-2 $\alpha$ , H-2 $\beta$ ), 2.27 (dt,  $J$  = 4.7 Hz, 10.5 Hz, 1H, H-20), 2.20-2.09 (m, 3H, H-7 $\beta$ , H-11 $\beta$ , H-17), 2.03-1.90 (5H, H-1 $\beta$ , H-7 $\alpha$ , H-11 $\alpha$ , H-16 $\beta$ , H-23 $\alpha$ ), 1.76-1.67 (m, 3H, H-5, H-6 $\beta$ , H-12 $\beta$ ), 1.66 (s, 3H, H-26), 1.64-1.60 (m, 2H, H-1 $\alpha$ , H-15 $\alpha$ ), 1.58 (s, 3H, H-27), 1.57-1.38 (m, 4H, H-6 $\beta$ , H-12 $\beta$ , H-16 $\alpha$ , H-22 $\alpha$ ), 1.32-1.27 (m, 1H, H-15 $\beta$ ), 1.06 (s, 6H, H-18, H-29), 1.02 (s, 3H, H-28), 0.93 (s, 3H, H-30), 0.86 (s, 3H, H-19)

**<sup>13</sup>C-NMR** ((CD<sub>3</sub>)<sub>2</sub>CO, 125.76 MHz):  $\delta$  [ppm] = 217.8 (C-3, >C=O), 178.3 (C-21, COOH), 136.2 (C-8, >C=C<), 134.8 (C-9, >C=C<), 133.2 (C-25, H>C=C<), 125.8 (C-24, H>C=C<), 53.3 (C-5, >CH-), 51.5 (C-14, >C<), 49.4 (C-20, HOOC>CH-), 48.7 (C-17, >CH-), 48.6 (C-10, >C<), 45.7 (C-13, >C<), 38.9 (C-4, >C<), 37.1 (C-1, -CH<sub>2</sub>-), 35.9 (C-2, -CH<sub>2</sub>-), 34.4 (C-22, -CH<sub>2</sub>-), 29.2 (C-7, -CH<sub>2</sub>-), 28.5 (C-16, -CH<sub>2</sub>-), 28.0 (C-29, -CH<sub>3</sub>), 27.7 (C-23, -CH<sub>2</sub>-), 26.8 (C-26, -CH<sub>3</sub>), 25.6 (C-30, -CH<sub>3</sub>), 22.9 (C-11, -CH<sub>2</sub>-), 22.4 (C-18, -CH<sub>3</sub>), 21.9 (C-6, -CH<sub>2</sub>-), 21.1 (C-18, -CH<sub>3</sub>), 18.7 (C-27, -CH<sub>3</sub>), 17.2 (C-19, -CH<sub>3</sub>)

**MS** (CI, 150 eV):  $m/z$  (%) = 455 (8) [M]<sup>+</sup>, 439 (8), 297 (4), 204 (76), 174 (100), 138 (12)

**HRMS** (CI, 150 eV): calculated for C<sub>30</sub>H<sub>46</sub>O<sub>3</sub>: 454.3447; found: 454.3450

Data for **9**:

**<sup>1</sup>H-NMR** ((CD<sub>3</sub>)<sub>2</sub>CO, 500.13 MHz):  $\delta$  [ppm] = 5.28 (dd,  $J$  = 2.9Hz, 6.4Hz, 1H, H-7), 5.12 (t,  $J$  = 7.2 Hz, 1H, H-24), 3.4 (t,  $J$  = 2.4 Hz, 1H, H-3), 2.35-2.26 (m, 2H, H-9, H-20), 2.02–1.70 (m, 8H, H-2 $\beta$ , H-5, H-6 $\alpha$ , H-6 $\beta$ , H-11 $\alpha$ , H-16 $\beta$ , H-17, H-23 $\alpha$ , H-12 $\beta$ ), 1.64-1.60 (m, 1H, H-1 $\alpha$ ), 1.66 (s, 3H, H-26), 1.56 (s, 3H, H-27), 1.56-1.49 (m, 6H, H-2 $\alpha$ , H-11 $\beta$ , H-12 $\alpha$ , H-15 $\alpha$ , H-15 $\beta$ , H-22 $\alpha$ ), 1.31-1.26 (m, 2H, H-1 $\beta$ , H-16 $\alpha$ ), 1.01 (s, 3H, H-30), 0.93 (s, 3H, H-19), 0.91 (s, 3H, H-29), 0.90 (s, 3H, H-28), 0.80 (s, 3H, H-18)

**<sup>13</sup>C-NMR** ((CD<sub>3</sub>)<sub>2</sub>CO, 125.76 MHz):  $\delta$  [ppm] = 178.2 (C-21, COOH), 147.7 (C-8, H>C=C<), 133.2 (C-25, H>C=C<), 125.8 (C-24, H>C=C<), 120.2 (C-7, H>C=C<), 76.7 (C-3, HO>CH-), 52.8 (C-14, >C<), 51.5 (C-17, >CH-), 50.4 (C-9, >CH-), 49.2 (C-20, HOOC>CH-), 46.2 (C-5, >CH-), 45.1 (C-13, >C<), 39.1 (C-4, >C<), 36.5 (C-10, >C<), 35.3 (C-15, -CH<sub>2</sub>-), 34.3 (C-22, -CH<sub>2</sub>-), 33.1 (C-1, -CH<sub>2</sub>-), 32.3 (C-12, -CH<sub>2</sub>-), 29.5 (C-29, -CH<sub>3</sub>), 28.8 (C-16, -CH<sub>2</sub>-), 27.8 (C-23, -CH<sub>2</sub>-), 27.5 (C-2, -CH<sub>2</sub>-), 26.8 (C-26, -CH<sub>3</sub>), 25.7 (C-6, -CH<sub>2</sub>-), 23.2 (C-28 -CH<sub>3</sub>), 23.1 (C-19, -CH<sub>3</sub>), 19.1 (C-11, -CH<sub>2</sub>-), 18.7 (C-27, -CH<sub>3</sub>), 14.5 (C-18, -CH<sub>3</sub>).

Data for **10**:

**<sup>1</sup>H-NMR** ((CD<sub>3</sub>)<sub>2</sub>CO, 500.13 MHz):  $\delta$  [ppm] = 5.26 (m, 1H, H-7), 5.09 (t,  $J$  = 7.0 Hz, 1H, H-24), 4.67 (br. s, 1H, H-3), 2.31 (m, 1H, H-9), 2.29 (m, 1H, H-20), 2.06 (s, 3H, H-32), 2.06-1.74 (m, 9 H, H-2 $\beta$ , H-5, H-6 $\alpha$ , H-6 $\beta$ , H-16 $\beta$ , H-17, H-23 $\alpha$ , H-23 $\beta$ , H-12 $\beta$ ), 1.67 (s, 3H, H-26), 1.58 (s, 3H, H-27), 1.64-1.42 (m, 8H, H-2 $\alpha$ , H-22 $\alpha$ , H-22 $\beta$ , H-15 $\alpha$ , H-15 $\beta$ , H-11 $\alpha$ , H-11 $\beta$ , H-12 $\alpha$ ), 1.33-1.31 (m, 3H, H-1 $\alpha$ , H-1 $\beta$ , H-16 $\alpha$ ), 0.97 (s, 3H, H-30), 0.96 (s, 3H, H-28), 0.94 (s, 3H, H-19), 0.83 (s, 3H, H-29), 0.74 (s, 3H, H-18)

**<sup>13</sup>C-NMR** ((CD<sub>3</sub>)<sub>2</sub>CO, 125.76 MHz):  $\delta$  [ppm] = 183.0 (C-21, COOH), 170.8 (C-31, >C=O), 145.6 (C-8, H>C=C<), 132.2 (C-25, H>C=C<), 123.6 (C-24, H>C=C<), 118.2 (C-7, H>C=C<), 78.3 (C-3, HO>CH-), 51.1 (C-14, >C<), 49.9 (C-17, >CH-), 48.3 (C-9, >CH-), 47.5 (C-20, HOOC>CH-), 45.6 (C-5, >CH-), 43.3 (C-13, >C<), 36.6 (C-4, >C<), 34.7 (C-10, >C<), 33.4 (C-15, -CH<sub>2</sub>-), 32.2 (C-22, -CH<sub>2</sub>-), 32.0 (C-1, -CH<sub>2</sub>-), 29.9 (C-12, -CH<sub>2</sub>-), 27.2 (C-29, -CH<sub>3</sub>), 27.1 (C-16, -CH<sub>2</sub>-), 26.1 (C-23, -CH<sub>2</sub>-), 22.9 (C-2, -CH<sub>2</sub>-), 25.7 (C-26, -CH<sub>3</sub>), 23.8 (C-6, -CH<sub>2</sub>-), 21.6 (C-19, -CH<sub>3</sub>), 21.4 (C-28 -CH<sub>3</sub>), 21.3 (C-32, -CH<sub>3</sub>), 17.6 (C-11, -CH<sub>2</sub>-), 17.5 (C-27, -CH<sub>3</sub>), 12.8 (C-18, -CH<sub>3</sub>)

### 3. Extraction and isolation of the compounds 11 – 14 from *Boswellia socotrana*

The compounds **11** – **14** described below were isolated according to the general procedures (see main manuscript) and according to Fig. S4.

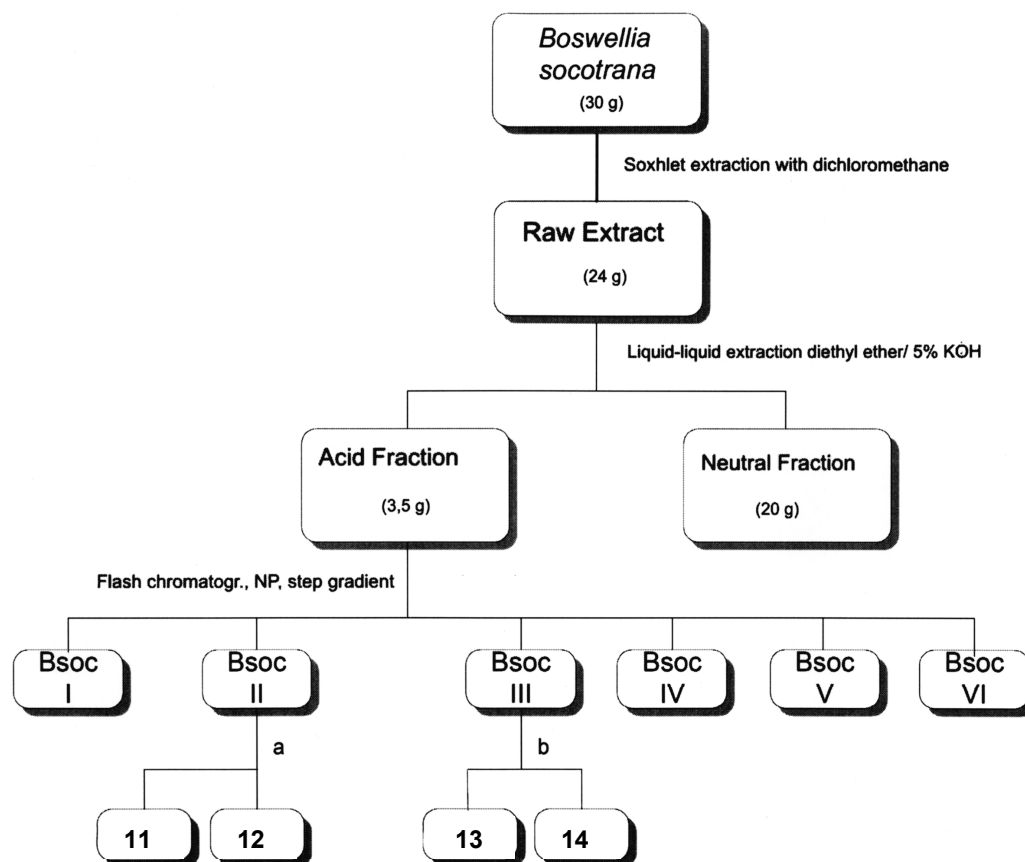

a = RP-18, Methanol/Wasser + 0,1 % TFA 90:10

b = RP-18, Methanol/Wasser + 0,1 % TFA 95:5

**Fig. S4.** Isolation of compounds **11** - **14**.

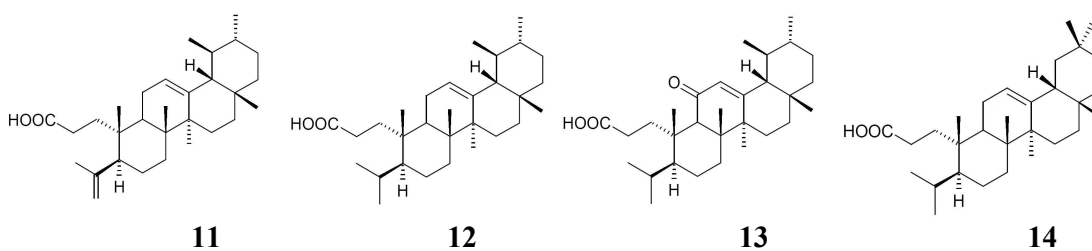

**Fig. S5.** Structures of compounds **11**-**14**. Roburic acid (**11**), 4,(23)-dihydro-roburic acid (**12**), 4,(23)-dihydro-11-keto-roburic acid (**13**), and 4,(23)-dihydro-nyctanthic acid (**14**).

Data for **11**:

<sup>1</sup>H-NMR ((CD<sub>3</sub>)<sub>2</sub>CO, 500.13 MHz): δ [ppm] = 5.21 (dd, *J* = 3.0 Hz, 4.2 Hz, 1H, H-12), 4.88 (br. s, 1H, H-24), 4.73 (br. s, 1H, H-24), 2.43-2.36 (ddd, *J* = 4.7 Hz, 11.4 Hz, 15.9 Hz, 1H, H-2α), 2.24-2.17 (ddd, *J* = 6.3 Hz, 11.5 Hz, 15.4 Hz, 1H, H-2β), 2.11-2.06 (m, 3H, H-5, H-11β, H-16α), 2.02-1.81 (m, 4H, H-6β, H-9, H-11α, H-15β), 1.78 (s, 3H, H-23), 1.68-1.55 (m, 2H, H-1α, H-7α), 1.46-1.29 (m, 8H, H-6α, H-7β, H-18, H-19, H-21α, H-21β, H-22α, H-22β), 1.17 (s, 3H, H-27), 1.11 (s, 3H, H-26), 1.09-1.04 (m, 1H, H-15α), 0.99 (s, 3H, H-25), 0.94-0.88 (m, 5H, H-16β, H-20, H-30), 0.84 (m, 6H, H-28, H-29)

<sup>13</sup>C-NMR ((CD<sub>3</sub>)<sub>2</sub>CO, 125.76 MHz): δ [ppm] = 175.9 (C-3, COOH), 149.5 (C-4, >C=CH<sub>2</sub>), 141.4 (C-13, >C=C<<sub>H</sub>), 126.5 (C-12, >C=C<<sub>H</sub>), 114.9 (C-24, >C=CH<sub>2</sub>), 61.1 (C-18, >CH-), 51.9 (C-5, >CH-), 44.5 (C-8, C-14, >C<), 43.3 (C-22, -CH<sub>2</sub>-), 41.6 (C-19, >CH-), 41.4 (C-20, >CH-), 40.8 (C-10, >C<), 39.6 (C-9, >CH-), 36.1 (C-1, -CH<sub>2</sub>-), 35.5 (C-17, >C<), 33.4 (C-7, -CH<sub>2</sub>-), 32.9 (C-21, -CH<sub>2</sub>-), 30.26 (C-28, CH<sub>3</sub>), 29.8 (C-2, -CH<sub>2</sub>-), 29.7 (C-16, -CH<sub>2</sub>), 28.3 (C-15, -CH<sub>2</sub>-), 26.4 (C-6, -CH<sub>2</sub>-), 25.3 (C-11, -CH<sub>2</sub>-), 25.0 (C-23, -CH<sub>3</sub>), 24.7 (C-27, -CH<sub>3</sub>), 22.7 (C-30, -CH<sub>3</sub>), 21.2 (C-25, -CH<sub>3</sub>), 19.0 (C-29, -CH<sub>3</sub>), 18.5 (C-26, -CH<sub>3</sub>)

Data for **12**:

<sup>1</sup>H-NMR ((CD<sub>3</sub>)<sub>2</sub>CO, 500.13 MHz): δ [ppm] = 5.21 (t, *J* = 3.6 Hz, 1H, H-12), 2.19 (t, *J* = 8.4 Hz, 2H, H-1β, H-2α), 2.09-2.06 (m, 1H, H-6α), 2.00-1.82 (m, 5H, H-4, H-9, H-11α, H-11β, H-15β), 1.73-1.67 (m, 2H, H-1α, H-2β), 1.59-1.52 (m, 2H, H-6β, H-7α), 1.46-1.29 (m, 8H, H-6α, H-7β, H-18, H-19, H-21α, H-21β, H-22α, H-22β), 1.15 (br. s, 4H, H-5, H-27), 1.08 (s, 3H, H-26), 1.06-1.04 (m, 1H, H-15α), 0.97 (s, 3H, H-25), 0.95 (br. s, 3H, H-23), 0.94-0.92 (d, *J* = 8.3 Hz, 4H, H-30, H-20), 0.86 (d, *J* = 6.8 Hz, 3H, H-24), 0.83 (d, *J* = 5.7 Hz, 6H, H-28, H-29)

<sup>13</sup>C-NMR ((CD<sub>3</sub>)<sub>2</sub>CO, 125.76 MHz): δ [ppm] = 175.9 (C-3, COOH, aus HMBC), 141.4 (C-13, >C=C<<sub>H</sub>), 126.7 (C-12, >C=C<<sub>H</sub>), 61.1 (C-18, >CH-), 49.4 (C-5, >CH-), 44.5 (C-8, C-14, >C<), 43.3 (C-22, -CH<sub>2</sub>-), 41.7 (C-10, >C<), 41.6 (C-19, >CH-), 41.4 (C-20, >CH-), 39.6 (C-9, >CH-), 35.5 (C-17, >C<), 35.1 (C-1, -CH<sub>2</sub>-), 33.8 (C-7, -CH<sub>2</sub>-), 32.9 (C-21, -CH<sub>2</sub>-), 30.26 (C-28, CH<sub>3</sub>), 29.8 (C-2, -CH<sub>2</sub>-), 29.7 (C-16, -CH<sub>2</sub>), 28.3 (C-15, -CH<sub>2</sub>-), 26.8 (C-4, >C<), 26.1 (C-23, -CH<sub>3</sub>), 25.4 (C-11, -CH<sub>2</sub>-), 24.5 (C-27, -CH<sub>3</sub>), 22.6 (C-30, -CH<sub>3</sub>), 21.0 (C-25, -CH<sub>3</sub>), 20.3 (C-24, -CH<sub>3</sub>), 19.9 (C-6, -CH<sub>2</sub>-), 19.0 (C-29, -CH<sub>3</sub>), 18.6 (C-26, -CH<sub>3</sub>)

Data for **13**:

<sup>1</sup>H-NMR ((CD<sub>3</sub>)<sub>2</sub>CO, 500.13 MHz): δ [ppm] = 5.50 (s, 1H, H-12), 2.76-2.72 (m, H-1β, H-9), 2.24-2.09 (m, 3H, H-2α, H-2β, H-16α), 2.00-1.47 (m, 10H, H-1α, H-4, H-6α, H-7β, H-15β, H-



18, H-19, H-21 $\alpha$ , H-21 $\beta$ , H-22 $\alpha$ ), 1.40 (s, 3H, H-27), 1.39-1.37 (m, 1H, H-7 $\alpha$ ), 1.29-1.26 (m, 1H, H-15 $\alpha$ ), 1.21-1.20 (d, 6H, H-25, H-26), 1.14-1.11 (m, 2H, H-5, H-6 $\beta$ ), 1.05 (s, 1H, H-16 $\beta$ ), 0.98-0.91 (m, 7H, H-20, H-23, H-30), 0.86-0.85 (m, 6H, H-24, H-28), 0.83 (d,  $J = 6.4$  Hz, 3H, H-29)

**$^{13}\text{C-NMR}$**  (( $\text{CD}_3$ ) $_2\text{CO}$ , 125.76 MHz):  $\delta$  [ppm] = 200.0 (C-11,  $>\text{C}=\text{O}$ ), 176.2 (C-3,  $\text{COOH}$ ), 165.6 (C-13,  $>\underline{\text{C}}=\underline{\text{C}}<_{\text{H}}$ ), 132.3 (C-12,  $>\text{C}=\underline{\text{C}}<_{\text{H}}$ ), 60.7 (C-18,  $>\text{CH-}$ ), 53.8 (C-9,  $>\text{CH-}$ ), 49.2 (C-5,  $>\text{CH-}$ ), 46.6 (C-10, C-14,  $>\text{C}<$ ), 45.9 (C-8,  $>\text{C}<$ ), 42.7 (C-22,  $-\text{CH}_2-$ ), 41.1 (C-20,  $>\text{CH-}$ ), 40.9 (C-19,  $>\text{CH-}$ ), 35.7 (C-17,  $>\text{C}<$ ), 35.4 (C-1,  $-\text{CH}_2-$ ), 32.6 (from DEPT 135, C-7,  $-\text{CH}_2-$ ), 30.37 (from DEPT 135, C-2,  $-\text{CH}_2-$ ), 30.2 (C-28,  $-\text{CH}_3$ ), 29.2 (C-16,  $-\text{CH}_2-$ ), 28.9 (C-15,  $-\text{CH}_2-$ ), 26.1 (C-4,  $>\text{C}<$ ), 26.0 (C-23,  $-\text{CH}_3$ ), 22.4 (C-30,  $-\text{CH}_3$ ), 21.8 (C-27,  $-\text{CH}_3$ ), 20.7 (C-25,  $-\text{CH}_3$ ), 20.3 (C-24,  $-\text{CH}_3$ ), 19.9 (C-26,  $-\text{CH}_3$ ), 19.2 (C-6,  $-\text{CH}_2-$ ), 18.8 (C-29,  $-\text{CH}_3$ )

**MS** (EI, 70 eV):  $m/z$  (%) = 456 (4), 273 (28), 193 (20), 155 (28), 137 (30), 91 (100)

**HRMS** (EI, 70 eV): calculated for  $\text{C}_{30}\text{H}_{48}\text{O}_3$ : 456.3603; found: 456.3600

Data for **14**:

**$^1\text{H-NMR}$**  (( $\text{CD}_3$ ) $_2\text{CO}$ , 500.13 MHz):  $\delta$  [ppm] = 5.24 (t,  $J = 3.4$  Hz, 1H, H-12), 2.18 (m, 2H, H-1 $\beta$ , H-2 $\alpha$ ), 2.10-2.06 (m, 1H, H-6 $\alpha$ ), 2.00-1.66 (m, 8H, H-1 $\alpha$ , H-2 $\beta$ , H-4, H-9, H-11 $\alpha$ , H-11 $\beta$ , H-15 $\beta$ , H-18, H-19 $\beta$ ), 1.56-1.22 (m, 6H, H-6 $\alpha$ , H-7 $\alpha$ , H-7 $\beta$ , H-21 $\alpha$ , H-22 $\alpha$ , H-22 $\beta$ ), 1.20 (s, 3H, H-27), 1.13-1.11 (m, 2H, H-5, H-6 $\beta$ , H-21 $\beta$ ), 1.05 (m, 5H, H-15 $\alpha$ , H-19 $\alpha$ , H-26), 0.96 (s, 3H, H-25), 0.94 (s, 3H, H-23), 0.89 (d, 6H, H-29, H-30), 0.87 (s, 3H, H-28), 0.86-0.84 (d, 4H, H-16 $\beta$ , H-24)

**$^{13}\text{C-NMR}$**  (( $\text{CD}_3$ ) $_2\text{CO}$ , 125.76 MHz):  $\delta$  [ppm] = 176.1 (C-3,  $\text{COOH}$ ), 146.8 (C-13,  $>\underline{\text{C}}=\underline{\text{C}}<_{\text{H}}$ ), 123.9 (C-12,  $>\text{C}=\underline{\text{C}}<_{\text{H}}$ ), 49.4 (C-5,  $>\text{CH-}$ ), 49.2 (C-18,  $>\text{CH-}$ ), 48.6 (C-19,  $>\text{CH-}$ ), 44.1 (C-14,  $>\text{C}<$ ), 41.5 (C-8, C-10  $>\text{C}<$ ), 39.6 (C-9,  $>\text{CH-}$ ), 38.7 (C-22,  $-\text{CH}_2-$ ), 36.4 (C-21,  $-\text{CH}_2-$ ), 34.9 (C-1,  $-\text{CH}_2-$ ), 34.6 (C-30,  $-\text{CH}_3$ ), 34.3 (C-17,  $>\text{C}<$ ), 33.4 (C-7,  $-\text{CH}_2-$ ), 32.7 (C-20,  $>\text{C}<$ ), 29.8 (C-28,  $\text{CH}_3$ ), 29.7 (C-2,  $-\text{CH}_2-$ ), 28.6 (C-16,  $-\text{CH}_2$ ), 27.9 (C-15,  $-\text{CH}_2-$ ), 27.2 (C-27,  $-\text{CH}_3$ ), 26.8 (C-4,  $>\text{C}<$ ), 26.2 (C-23,  $-\text{CH}_3$ ), 25.5 (C-11,  $-\text{CH}_2-$ ), 24.9 (C-29,  $-\text{CH}_3$ ), 20.8 (C-25,  $-\text{CH}_3$ ), 20.3 (C-24,  $-\text{CH}_3$ ), 19.9 (C-6,  $-\text{CH}_2-$ ), 18.40 (C-26,  $-\text{CH}_3$ )

**MS** (EI, 70 eV):  $m/z$  (%) = 442 (24)  $[\text{M}]^+$ , 427 (16), 218 (100), 203 (40), 91 (44)

**HRMS** (EI, 70 eV): calculated for  $\text{C}_{30}\text{H}_{50}\text{O}_2$ : 442.3810; found: 442.3780



### 3. Extraction and isolation of the compound 17 from *Boswellia carterii*

Compound 17 described below was isolated according to the general procedures and according to Fig. S7.

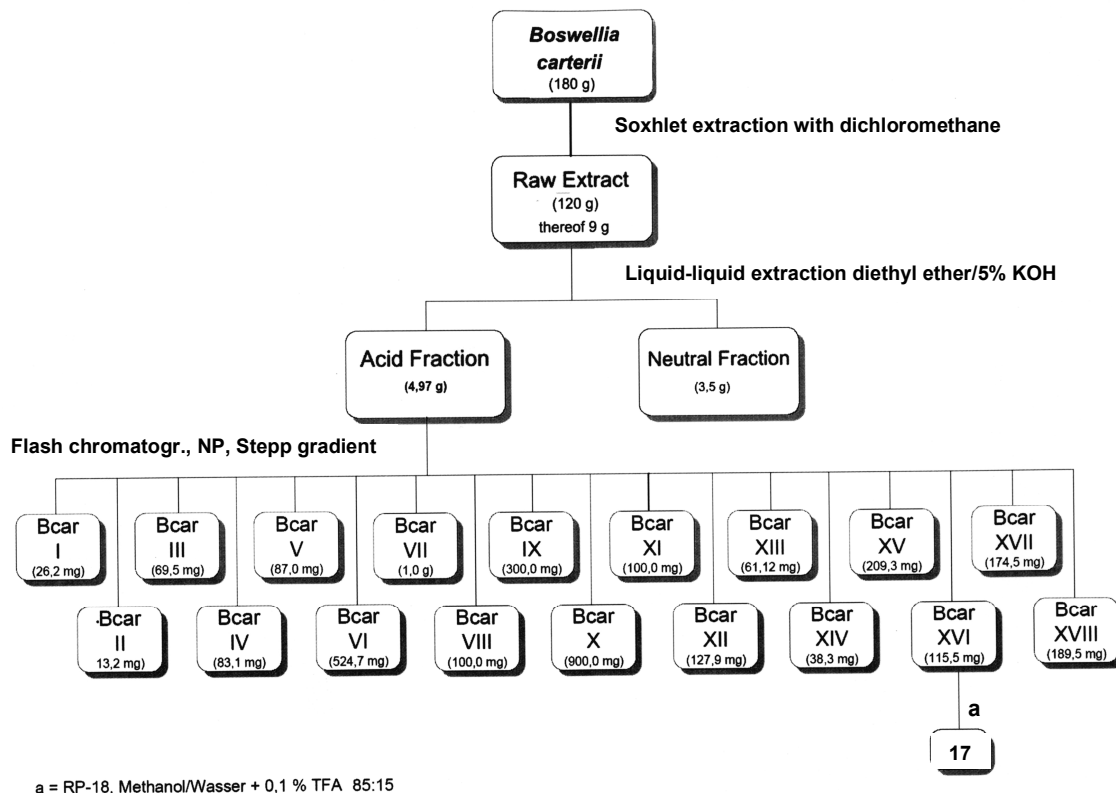

Fig. S7. Isolation of compound 17.

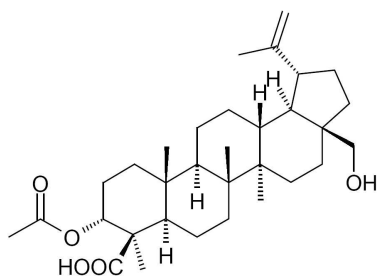

17

Fig. S8. Structure of 3-O-acetyl-28-hydroxy-lupeolic acid (17).

Data for 17:

<sup>1</sup>H-NMR ((CD<sub>3</sub>)OD, 500.13 MHz): δ [ppm] = 5.24 (t, *J* = 2.7 Hz, 1H, H-3), 4.69 (dd, *J* = 2.2 Hz, 1H, H-29), 4.58 (dd, *J* = 2.2 Hz, 1.4 Hz, 1H, H-29), 3.77-3.74 (dd, *J* = 1.3 Hz, 11.1 Hz, 1H, H-28), 3.29 (s, 1H, H-28), 2.43 (dt, *J* = 5.9 Hz, 11.1 Hz, 1H, H-19), 2.21-2.13 (m, 1H, H-2β), 2.08 (s, 3H, H-32), 1.99-1.90 (m, xH, H-6β, H-16β, H-21β, H-22β), 1.83-1.70 (m, 4H, H-6α, H-12β, H-13, H-15β), 1.70 (s, 3H, H-30), 1.66-1.37 (m, 9H, H-1β, H-2α, H-5, H-7α, H-

7 $\beta$ , H-9, H-11 $\beta$ , H-18, H-21 $\alpha$ ), 1.26-1.20 (m, 2H, H-11 $\alpha$ , H-16 $\alpha$ ), 1.17 (s, 3H, H-23), 1.16-1.13 (m, 1H, H-1 $\alpha$ ), 1.11 (s, 3H, H-26), 1.10-1.06 (m, 2H, H-12 $\alpha$ , H-15 $\alpha$ ), 1.05 (s, 3H, H-27), 1.03-1.00 (m, 1H, H-22 $\alpha$ ), 0.84 (s, 3H, H-25)

**<sup>13</sup>C-NMR** ((CD<sub>3</sub>)OD, 125.76 MHz):  $\delta$  [ppm] = 179.8 (C-24, COOH), 172.4 (C-31, >C=O), 151.9 (C-20, >C=C<H<sub>2</sub>), 110.3 (C-29, >C=C<H<sub>2</sub>), 75.3 (C-3, <sub>AcO</sub>>CH-), 60.4 (C-28, -CH<sub>2</sub>-OH), 51.8 (C-5, >CH-), 51.1 (C-9, >CH-), 50.0 (C-18, >CH-), 47.8 (C-4, >C<), 43.9 (C-14, >C<), 42.2 (C-8, >C<), 38.9 (C-10, >C<), 38.8 (C-13, >CH-), 35.8 (C-1, -CH<sub>2</sub>-), 35.4 (C-7, -CH<sub>2</sub>-), 35.1 (C-22, -CH<sub>2</sub>-), 30.9 (C-21, -CH<sub>2</sub>-), 30.7 (C-17, >C<), 30.4 (C-16, -CH<sub>2</sub>-), 28.2 (C-15, -CH<sub>2</sub>-), 26.7 (C-12, -CH<sub>2</sub>-), 24.8 (C-2, -CH<sub>2</sub>-), 24.3 (C-23, -CH<sub>3</sub>), 22.2 (C-11, -CH<sub>2</sub>-), 21.1 (C-32, -CH<sub>3</sub>), 20.8 (C-6, -CH<sub>2</sub>-), 19.3 (C-30, -CH<sub>3</sub>), 16.5 (C-26, -CH<sub>3</sub>), 15.2 (C-27, -CH<sub>3</sub>), 14.1 (C-25, -CH<sub>3</sub>)

**MS** (CI, 150 eV): m/z (%) = 483 (100), 434 (40), 380 (80), 334 (28), 203 (16), 175 (16)

**MS** (ESI -): 513 [M-1]<sup>-</sup> (100)
